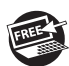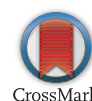

# Diabetic Ketoacidosis Following Bariatric Surgery in Patients With Type 2 Diabetes

Diabetes Care 2016;39:e121–e122 | DOI: 10.2337/dc16-0280

Amin Andilib,<sup>1</sup> Aly Elbahrawy,<sup>1</sup>  
Saeed Alshlwi,<sup>1</sup> Ahmed Alkhamis,<sup>1</sup>  
Wen Hu,<sup>2</sup> Sebastian Demyttenaere,<sup>1</sup>  
Rajesh Aggarwal,<sup>1</sup> and Olivier Court<sup>1</sup>

Diabetic ketoacidosis (DKA) is a life-threatening complication mainly linked to type 1 diabetes. Clinical features of DKA after bariatric surgery are mostly unknown and likely underreported, especially in those with type 2 diabetes. The objective of this study is to emphasize occurrence and clinical presentation of DKA in patients with type 2 diabetes after bariatric surgery. We also aim to describe diagnostic challenges related to new medications such as sodium–glucose cotransporter 2 inhibitors (SGLT-2i) that can cause euglycemic DKA (1,2).

We report four cases of DKA in three patients with type 2 diabetes after bariatric surgery at a single institution from January 2010 to December 2015. All cases presented within 30 days following surgery, were classified as moderate to severe based on criteria from the American Diabetes Association (3,4), and required admission to the intensive care unit. Table 1 provides detailed description of the cases.

Baseline glycated hemoglobin A<sub>1c</sub> (HbA<sub>1c</sub>) was 9.4% (79 mmol/mol) for patient 1, 9.5% (80 mmol/mol) for patient 2, and missing for patient 3. All patients had type 2 diabetes treated with insulin for a median duration of 15 years (range 2–17), which represents global trends as more patients undergo surgery with worse insulin resistance and less  $\beta$ -cell reserves.

Median time to DKA was 13 days (range 3–27). Main presenting symptoms were nausea, vomiting, and abdominal pain, which are common soon after bariatric surgery. All cases were likely precipitated in part by inadequate insulin therapy or noncompliance compounded by decreased oral intake and dehydration in the early postoperative period. This observation is in keeping with a recent study by Aminian et al. (5) describing four cases of DKA in patients with type 2 diabetes after bariatric surgery. Unlike their report where septic complications were main culprits in three patients, we observed no DKA as a result of postoperative infectious complications confirmed by abdominal imaging. Median time to treatment with insulin infusion was 1.3 h (range 0.6–2.1), which highlights the challenge in timely diagnosis in these patients who present with common symptoms after bariatric surgery. Moreover, the findings emphasize the need for better preoperative patient education and closer glucose follow-up during the hospital stay. A visit to an endocrinologist within the first 2 weeks after discharge is especially important as all cases occurred within the first month.

Interestingly, patient 3 presented on day 9 with euglycemic DKA while on SGLT-2i (canagliflozin). In a recent case series, Peters et al. (2) reported euglycemic

DKA linked to SGLT-2 inhibition. However, our study is the first to report this condition in patients with type 2 diabetes after bariatric surgery. Here, DKA could have also been precipitated by lower oral intake after surgery and omission of insulin. Delay between presentation to emergency department and initiation of insulin infusion was 2.1 h, which underlines the difficulty of making the proper diagnosis given the “euglycemic” presentation.

Finally, our findings emphasize the need for a high index of suspicion for DKA in patients with type 2 diabetes who present early after bariatric surgery, especially those on SGLT-2i. Mild hyperglycemia should not preclude prompt diagnosis and timely delivery of treatment. Diagnosis can be hastened with urinalysis demonstrating ketones. Our observation further suggests stopping SGLT-2i before planned surgery, possibly prior to starting the 2-week course of a low-calorie diet.

**Duality of Interest.** No potential conflicts of interest relevant to this article were reported.

**Author Contributions.** A.An. was responsible for concept development and study design. A.An., A.E., S.A., A.Al., W.H., R.A., and O.C. were involved in the management of patients. A.E., S.A., and A.Al. performed data collection and analysis. All authors reviewed the data. A.An., A.E., S.A., and S.D. drafted the manuscript, and all coauthors revised and edited the final

<sup>1</sup>Center for Bariatric Surgery, Division of General Surgery, Department of Surgery, McGill University, Montreal, Quebec, Canada

<sup>2</sup>Division of Endocrinology and Metabolism, Department of Medicine, McGill University, Montreal, Quebec, Canada

Corresponding author: Amin Andilib, amin.andilib@mcgill.ca.

Received 9 February 2016 and accepted 12 March 2016.

© 2016 by the American Diabetes Association. Readers may use this article as long as the work is properly cited, the use is educational and not for profit, and the work is not altered.

**Table 1—Characteristics of patients with type 2 diabetes with DKA after bariatric surgery**

|                                        | Patient 1                                                               |                                                       | Patient 2                                       | Patient 3                                                                        |
|----------------------------------------|-------------------------------------------------------------------------|-------------------------------------------------------|-------------------------------------------------|----------------------------------------------------------------------------------|
| Case                                   | 1                                                                       | 2                                                     | 3                                               | 4                                                                                |
| Age (years)                            | 62                                                                      |                                                       | 54                                              | 58                                                                               |
| Sex                                    | Female                                                                  |                                                       | Female                                          | Male                                                                             |
| BMI (kg/m <sup>2</sup> )               | 41.0                                                                    |                                                       | 37.8                                            | 49.0                                                                             |
| Baseline HbA <sub>1c</sub> (%)         | 9.4                                                                     |                                                       | 9.5                                             | N/A                                                                              |
| Duration of T2DM (years)               | 2                                                                       |                                                       | 15                                              | 17                                                                               |
| Preoperative medications               | Levemir, glyburide (10 mg b.i.d.), and Komboglyze (2.5/1,000 mg b.i.d.) |                                                       | Levemir, Humalog, and metformin (800 mg b.i.d.) | Levemir, NovoRapid, metformin (1,000 mg b.i.d.), and canagliflozin (300 mg q.d.) |
| Insulin doses (IU)                     |                                                                         |                                                       |                                                 |                                                                                  |
| Long-acting                            | 0–0–0–36                                                                |                                                       | 30–0–0–40                                       | 0–0–0–65                                                                         |
| Short-acting                           |                                                                         |                                                       | 25–25–25–0                                      | 35–35–35–0                                                                       |
| Surgery                                | LSG                                                                     |                                                       | LRYGB                                           | LSG*                                                                             |
| Time to presentation (days)            | 17                                                                      | 27                                                    | 3                                               | 9                                                                                |
| Symptoms of presentation               | Nausea, vomiting, abdominal pain, and poor oral intake                  | Nausea, vomiting, diarrhea, and altered mental status | Nausea and shortness of breath                  | Nausea, vomiting, and abdominal pain                                             |
| Precipitating factors                  | Omission of insulin and dehydration                                     | Omission of insulin† and dehydration                  | Omission of insulin                             | Canagliflozin and omission of insulin                                            |
| Arterial pH‡                           | N/A                                                                     | 7.1                                                   | 6.8                                             | 7.2                                                                              |
| Anion gap (mmol/L)                     | 30                                                                      | 25                                                    | 22                                              | 26                                                                               |
| Bicarbonate (mmol/L)                   | 4.5                                                                     | 4.5                                                   | 3.7                                             | 9.4                                                                              |
| Serum glucose (mmol/L)                 | 34.3                                                                    | 29.4                                                  | 25.0                                            | 17.0§                                                                            |
| Serum ketones   (mmol/L)               | 9.7                                                                     | 9.4                                                   | 10.3                                            | 10.5                                                                             |
| Urine ketones                          | Positive                                                                | Positive                                              | Positive                                        | Positive                                                                         |
| White blood cells (10 <sup>9</sup> /L) | 16.8                                                                    | 29.1                                                  | 23.7                                            | 17.5                                                                             |
| Serum creatinine (mmol/L)              | 220                                                                     | 177                                                   | 125                                             | 210                                                                              |
| Severity                               | Moderate–severe                                                         | Severe                                                | Severe                                          | Moderate–severe                                                                  |
| Organ dysfunction                      | AKI                                                                     | AKI and encephalopathy¶                               | AKI                                             | AKI                                                                              |
| Time to treatment (h)                  | 0.6                                                                     | 0.6                                                   | 2.0                                             | 2.1                                                                              |
| Where treated                          | ICU                                                                     | ICU                                                   | ICU                                             | ICU                                                                              |

AKI, acute kidney injury; ICU, intensive care unit; LRYGB, laparoscopic Roux-en-Y gastric bypass; LSG, laparoscopic sleeve gastrectomy; N/A, not available; T2DM, type 2 diabetes mellitus. \*The operation was converted to laparotomy for lysis of dense adhesions. †The omission of insulin in this presentation was because of noncompliance with recommended regimen by the patient. ‡None of the patients had a sample of arterial blood gas upon presentation to the emergency department. The reported values are from the first 2 h after presentation, hence the initial arterial pH may have been lower. §Patient presented with euglycemic DKA, which is likely caused by SGLT-2i (canagliflozin). ||Serum ketones were measured as a direct assay of plasma  $\beta$ -hydroxybutyrate (normal range is <0.6 mmol/L). ¶Patient required ventilatory support because of her metabolic encephalopathy upon presentation.

version. A.An. is the guarantor of this work and, as such, had full access to all the data in the study and takes responsibility for the integrity of the data and the accuracy of the data analysis.

## References

- Munro JF, Campbell IW, McCuish AC, Duncan LJ. Euglycaemic diabetic ketoacidosis. *BMJ* 1973;2:578–580
- Peters AL, Buschur EO, Buse JB, Cohan P, Diner JC, Hirsch IB. Euglycemic diabetic ketoacidosis: a potential complication of treatment with sodium-glucose cotransporter 2 inhibition. *Diabetes Care* 2015;38:1687–1693
- Kitabchi AE, Umpierrez GE, Murphy MB, et al. Management of hyperglycemic crises in patients with diabetes. *Diabetes Care* 2001;24:131–153
- Kitabchi AE, Umpierrez GE, Murphy MB, Kreisberg RA. Hyperglycemic crises in adult patients with diabetes: a consensus statement from the American Diabetes Association. *Diabetes Care* 2006;29:2739–2748
- Aminian A, Kashyap SR, Burguera B, et al. Incidence and clinical features of diabetic ketoacidosis after bariatric and metabolic surgery. *Diabetes Care* 2016;39:e50–e53
